# Supplementary material
Source: MDPI journal article supplement (https://www.mdpi.com/2076-3417/12/12/5965)
Supplement: s1 [file s1]

## Supplementary Materials

### Synthesis of the HESOs

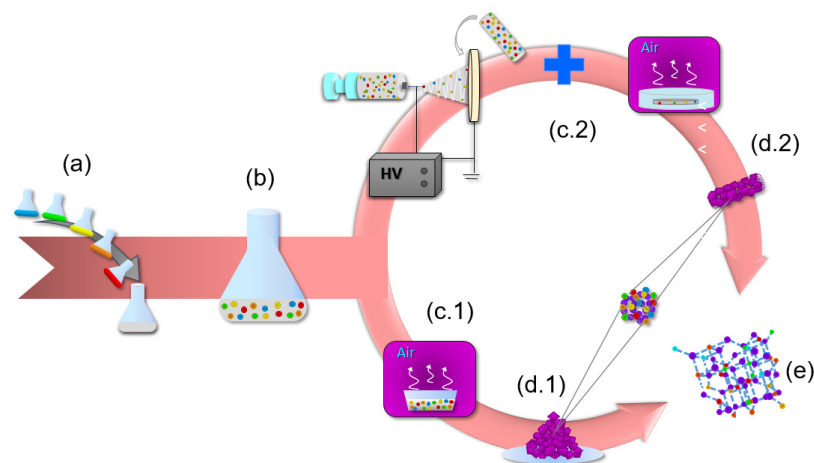

**Figure S1.** Schematic description of the experimental procedure followed to synthesize the HEO-samples: (a) addition of the selected reagents, one at a time, to the solvent(s) and (b) resulting solution containing an equimolar combination of five metals; (c.1) calcination and (d.1) HEO-nanoparticles obtained via sol-gel method; (c.2) electrospinning, followed by calcination, and (d.2) as-obtained HEO-nanofibers; (e) spinel structure of the HEO-grains constituting nanoparticles and nanofibers.

### Physicochemical properties of the produced HESOs

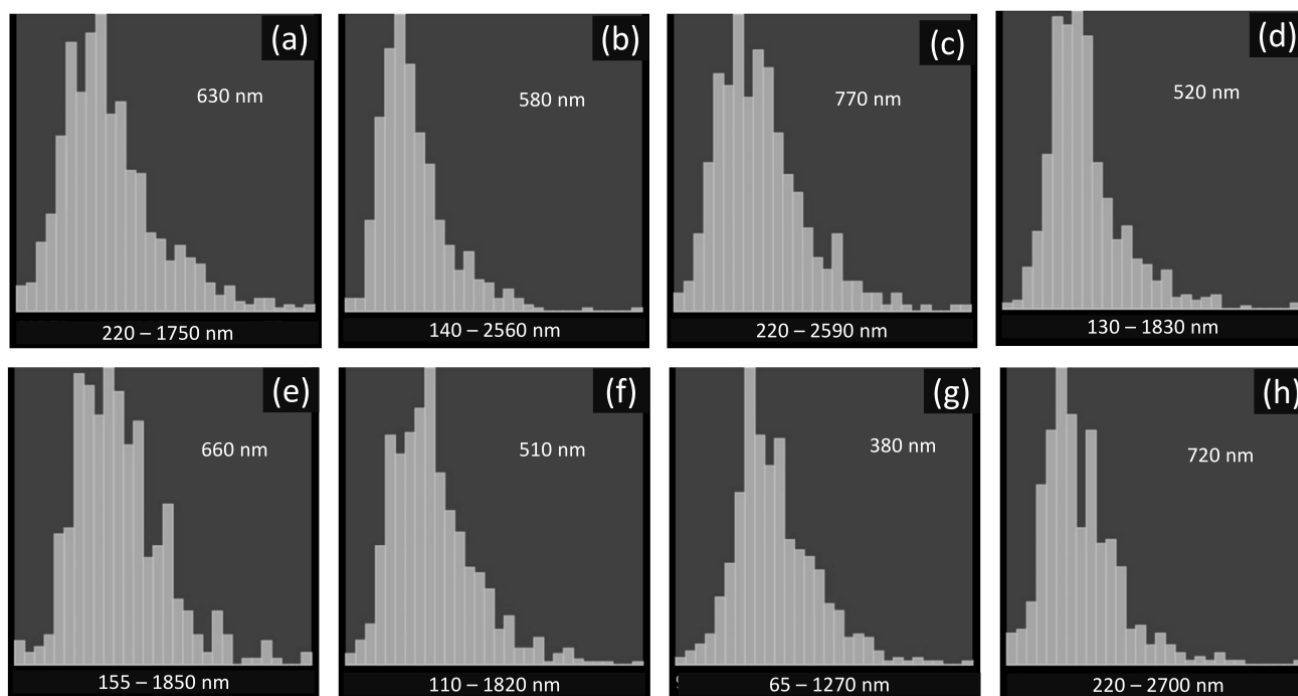

**Figure S2.** NF diameter distributions, as resulting from the automated measurement via the microscope software from their SEM images. The results shown refer to samples (a) 5ME-a, (b) 5MK-a, (c) 5ML-a, (d) 5MD-b, (e) 5ME-b, (f) 5MF-b, (g) 5MG-b and (h) 5ML-b.

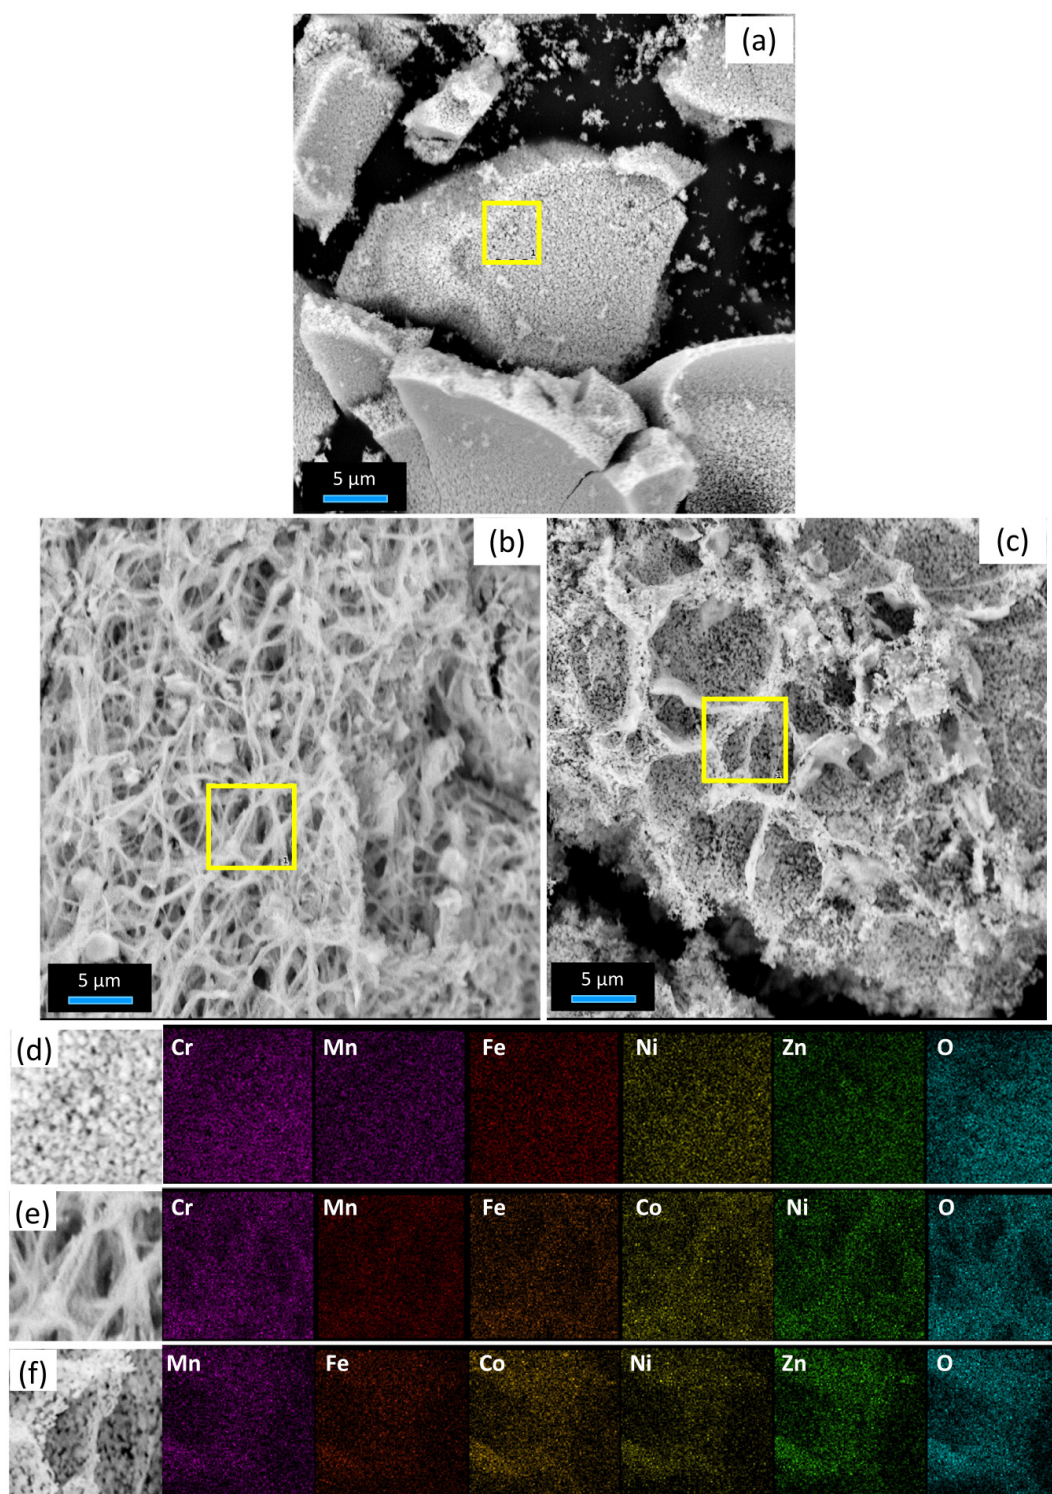

**Figure S3.** Results of the SEM/EDX analysis on samples (a,d) 5MG-sg, (b,e) 5ME-a and (c,f) 5MD-a. (a–c) SEM images; (d–f) elemental maps.

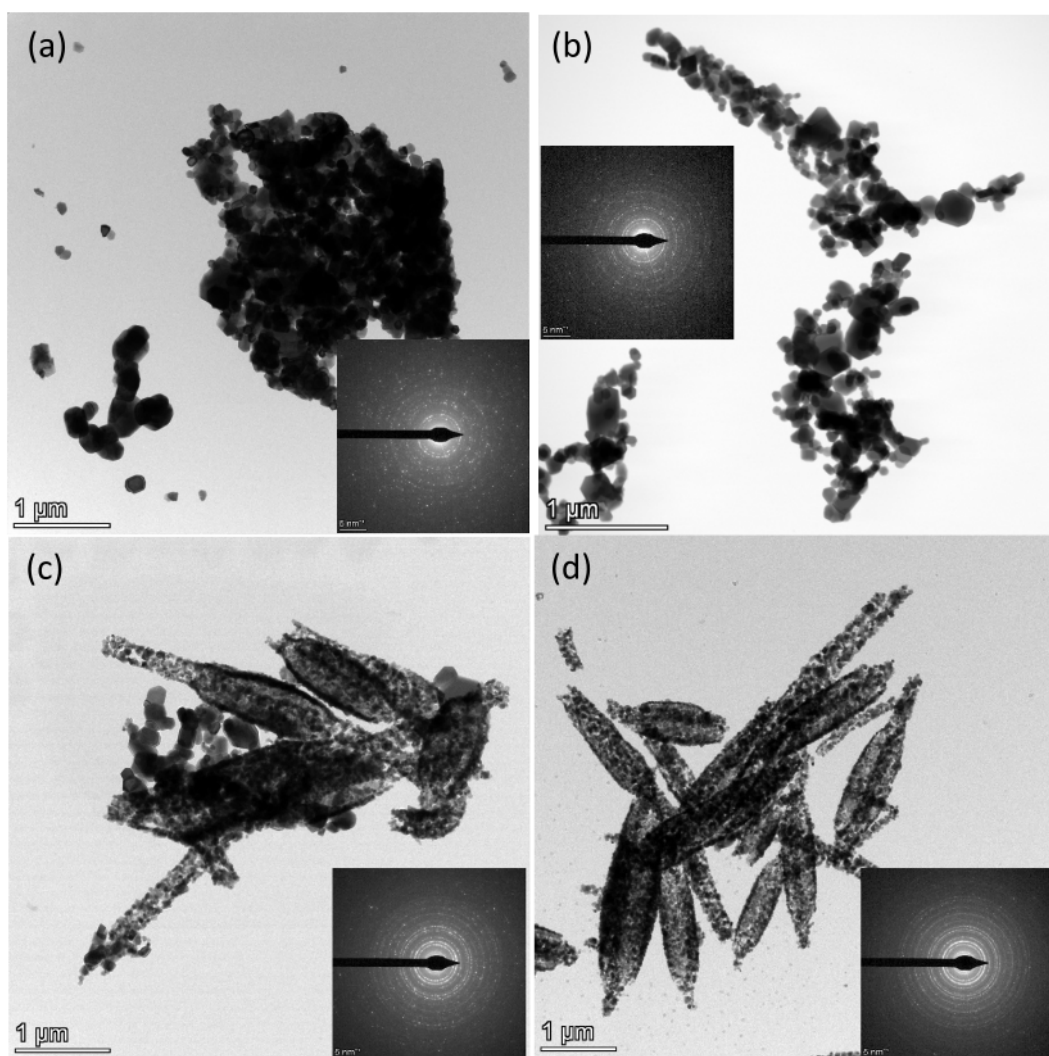

**Figure S4.** TEM images of samples (a) 5MF-sg, (b) 5ME-b, (c) 5MF-b and (d) 5MG-b. Insets: SAED patterns.

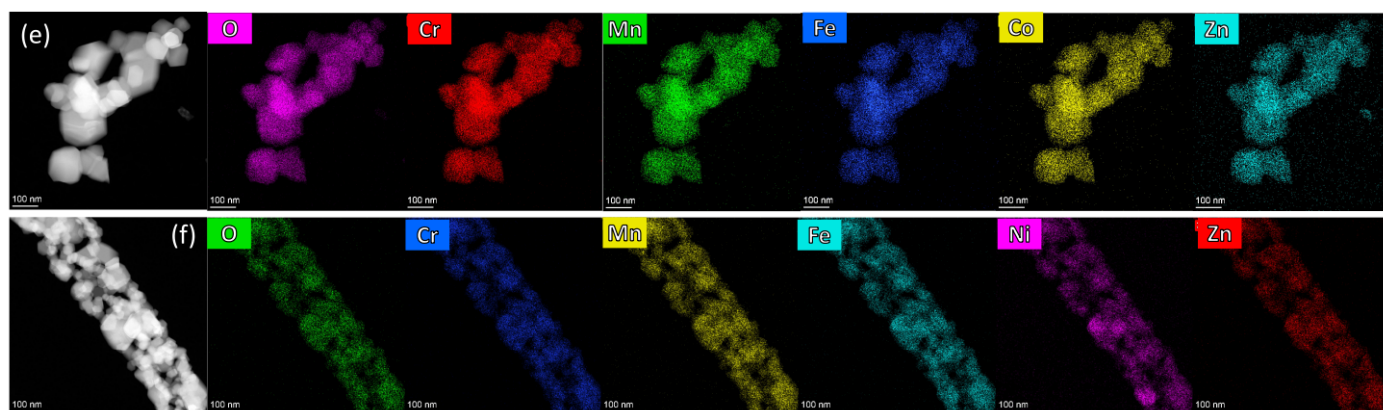

**Figure S5.** Results of the STEM/EDX analysis on samples (e) 5MF-sg and (d) 5MG-b.



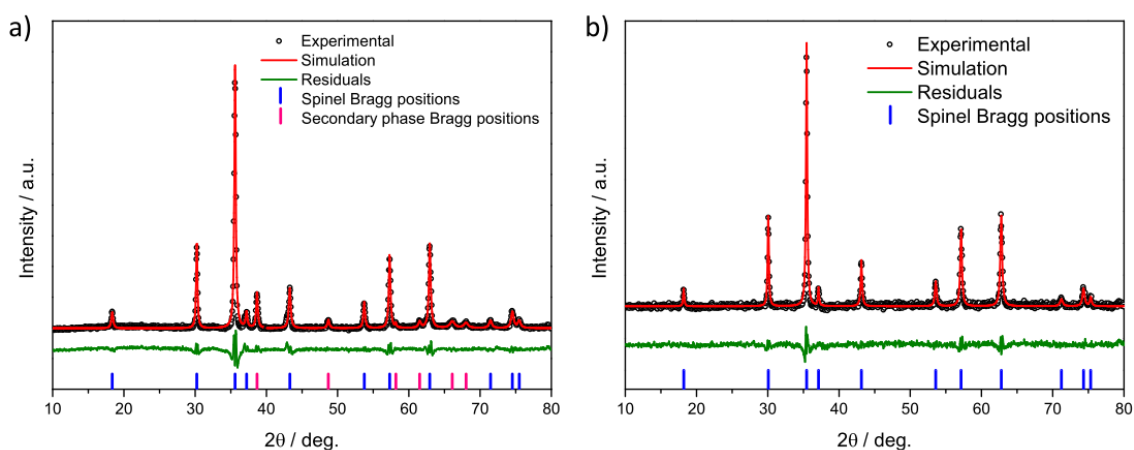

**Figure S6.** Rietveld refinements. The cases shown refer to samples (a) 5ML-sg and (b) 5MF-a.

**Table S1.** Results of Rietveld refinements.

| Sample | Secondary Phase(s)/% |
|--------|----------------------|
| 5MA-sg | 11.5                 |
| 5MD-sg | 0.0                  |
| 5ME-sg | 0.0                  |
| 5MF-sg | 0.0                  |
| 5MG-sg | 0.0                  |
| 5MH-sg | 1.6                  |
| 5MI-sg | 1.2                  |
| 5MJ-sg | 1.3                  |
| 5MK-sg | 3.1                  |
| 5ML-sg | 12.4                 |
| 5MD-a  | 0.0                  |
| 5ME-a  | 0.0                  |
| 5MF-a  | 0.0                  |
| 5MK-a  | 8.0                  |
| 5ML-a  | 8.8                  |
| 5MD-b  | 8.6                  |
| 5ME-b  | 0.0                  |
| 5MF-b  | 0.0                  |
| 5MG-b  | 0.0                  |
| 5ML-b  | 7.3                  |

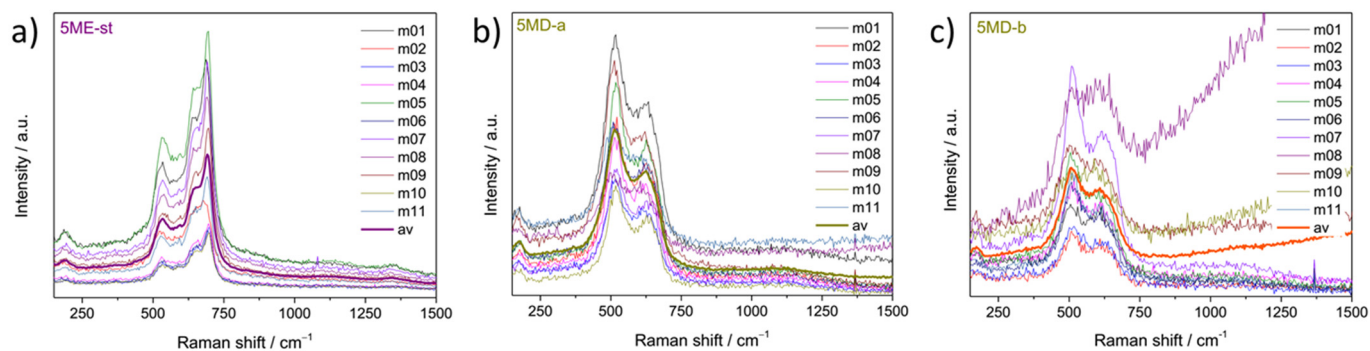

**Figure S7.** Micro-Raman spectra of representative samples (a) 5ME-sg, (b) 5MD-a and (c) 5MD-b, as measured at different random locations and relative averaged spectra (av), calculated for each sample.

**Physicochemical properties of the (Li,Cr,Mn,Fe,Co,Zn) HESO NPs**

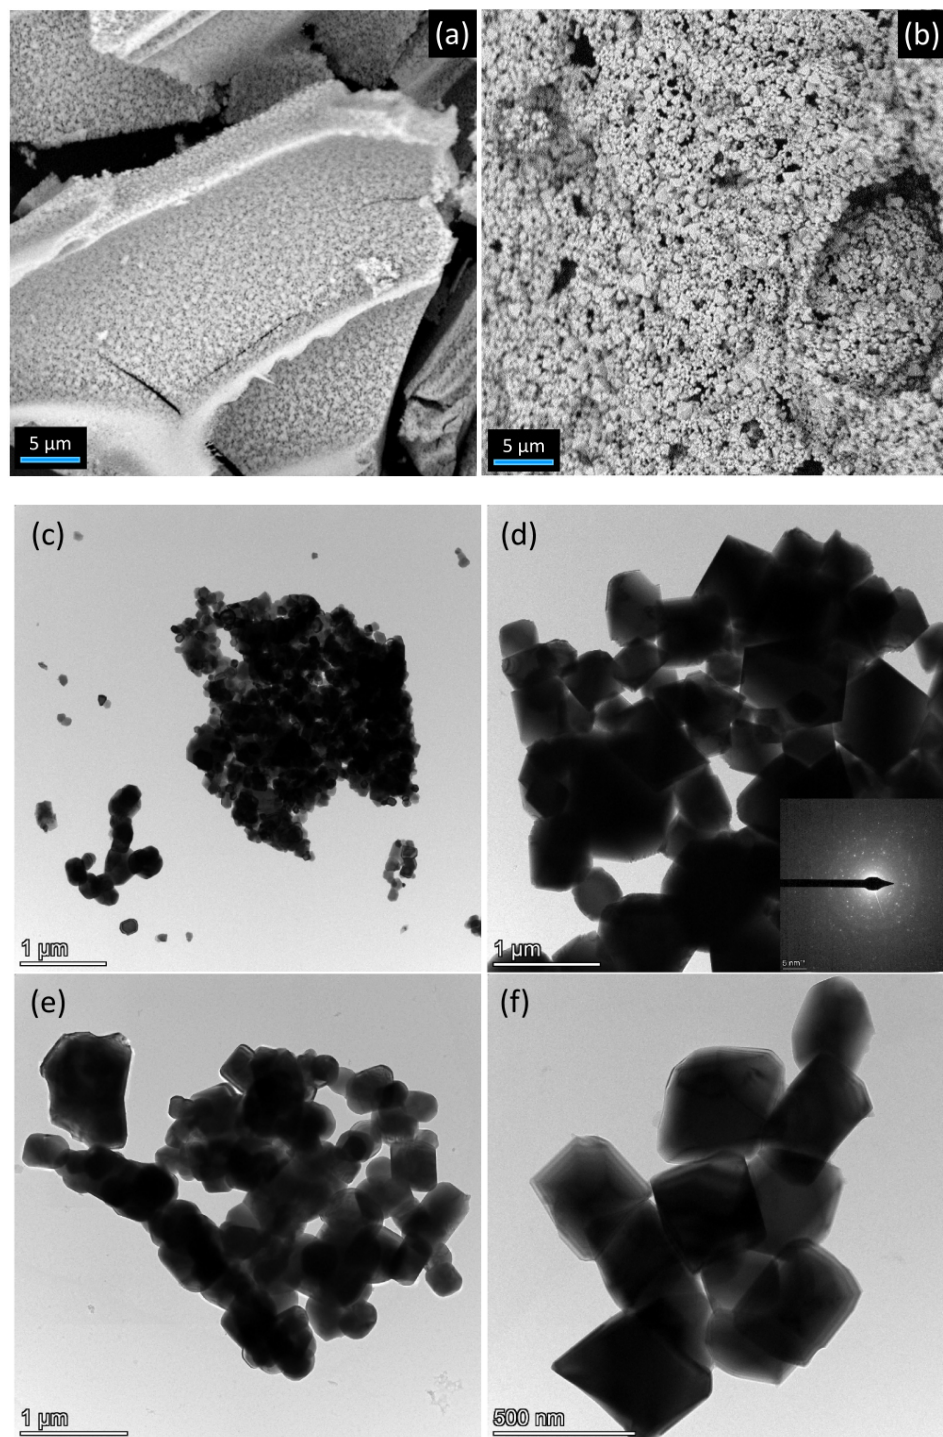

**Figure S8.** (a,b) SEM and (c–f) TEM images of samples (a,c) 5MF-sg and (b,d–f) Li5MF-sg.

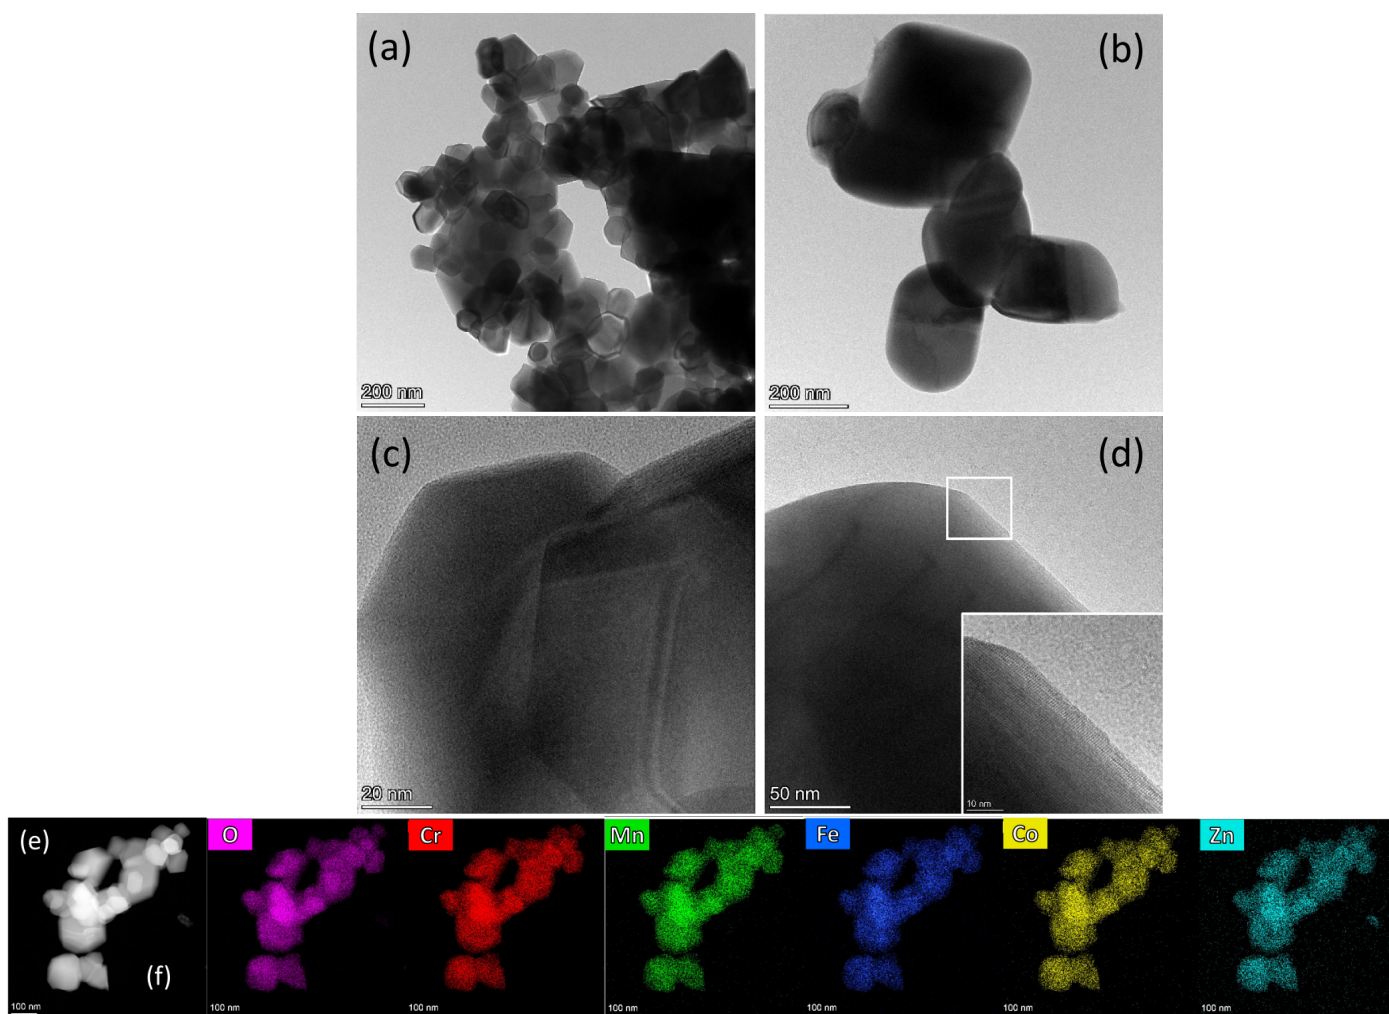

**Figure S9.** HRTEM images of samples (a) 5MF-sg and (b-d) Li5MF-sg. (e) Results of the STEM/EDX analysis on sample Li5MF-sg.

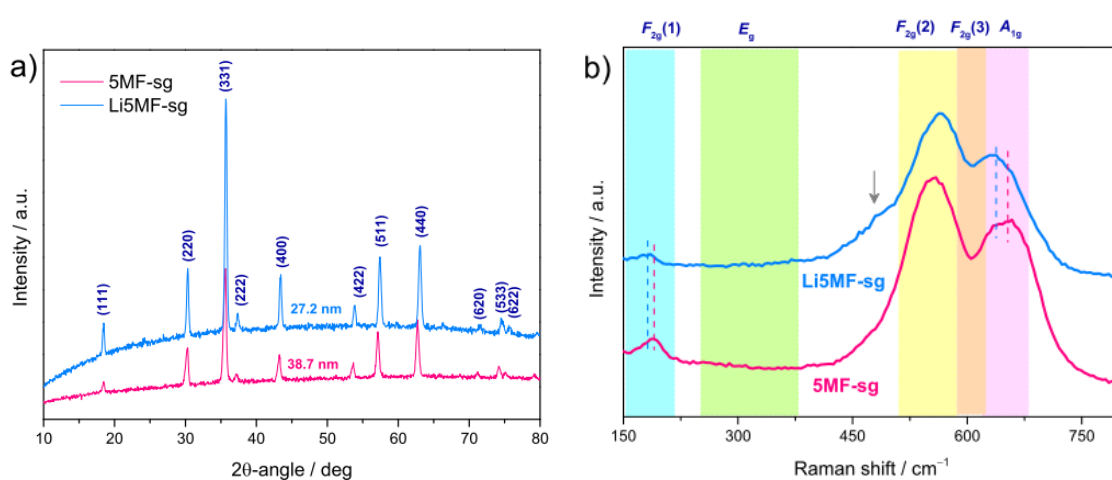

**Figure S10.** Results of (a) XRD and (b) MRS analyses on samples 5MF-sg and Li5MF-sg, evaluated as anode materials in LIBs.

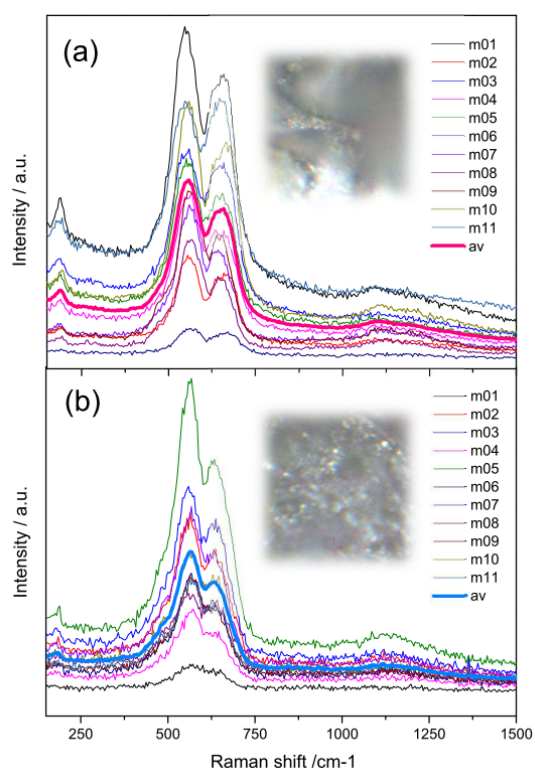

**Figure S11.** Micro-Raman spectra of samples (a) 5MF-sg and (b) Li5MF-sg, as measured at different random locations and relative averaged spectra (av), calculated for each sample.

#### Physicochemical properties of the C/(Cr,Mn,Fe,Co,Zn) HESO NFs

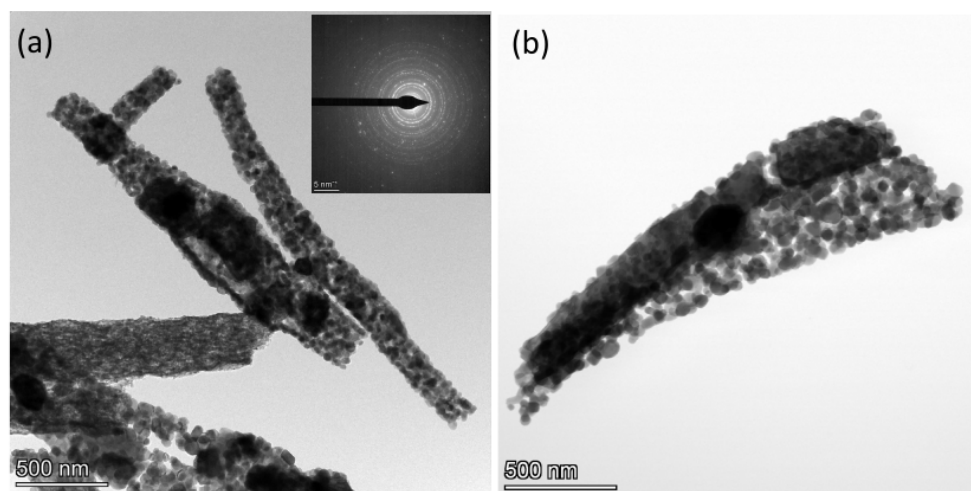

**Figure S12.** TEM images of sample C5MF-b. Inset: SAED pattern.



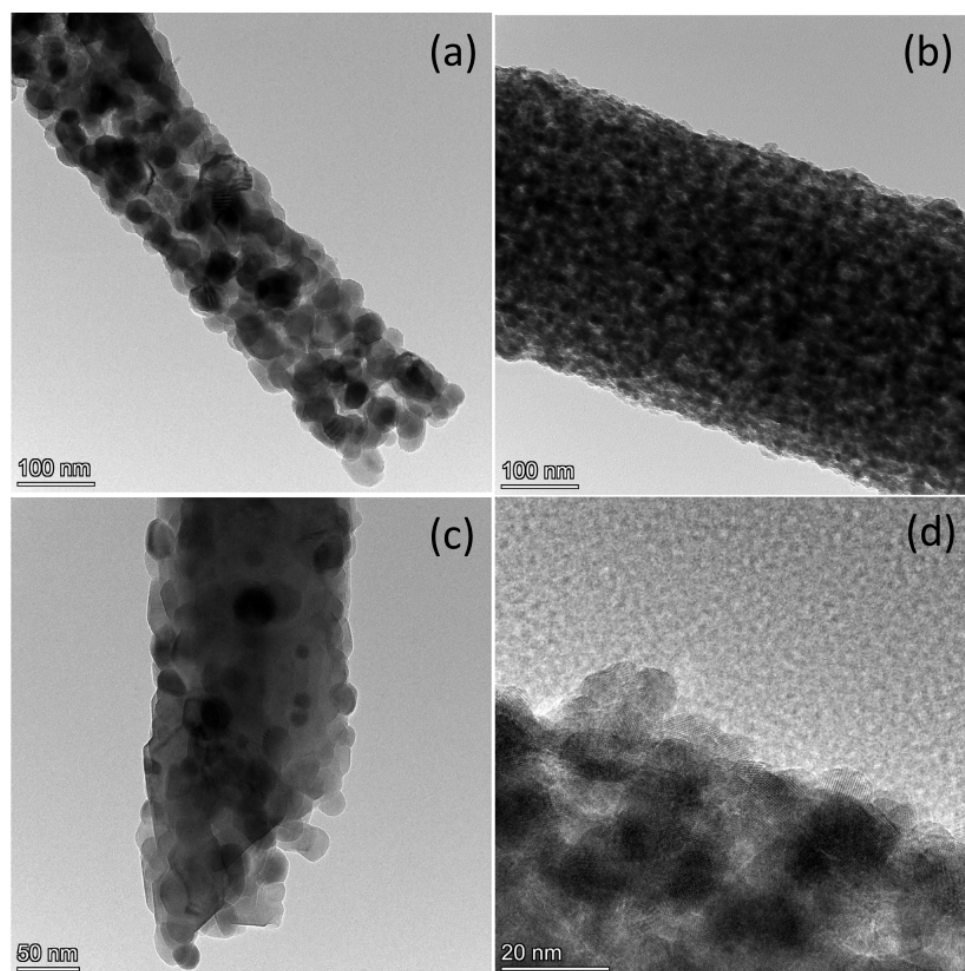

**Figure S13.** HRTEM images of sample C5MF-b. The shown results refer to (a) C-poorer and (b-d) C-richer NFs.



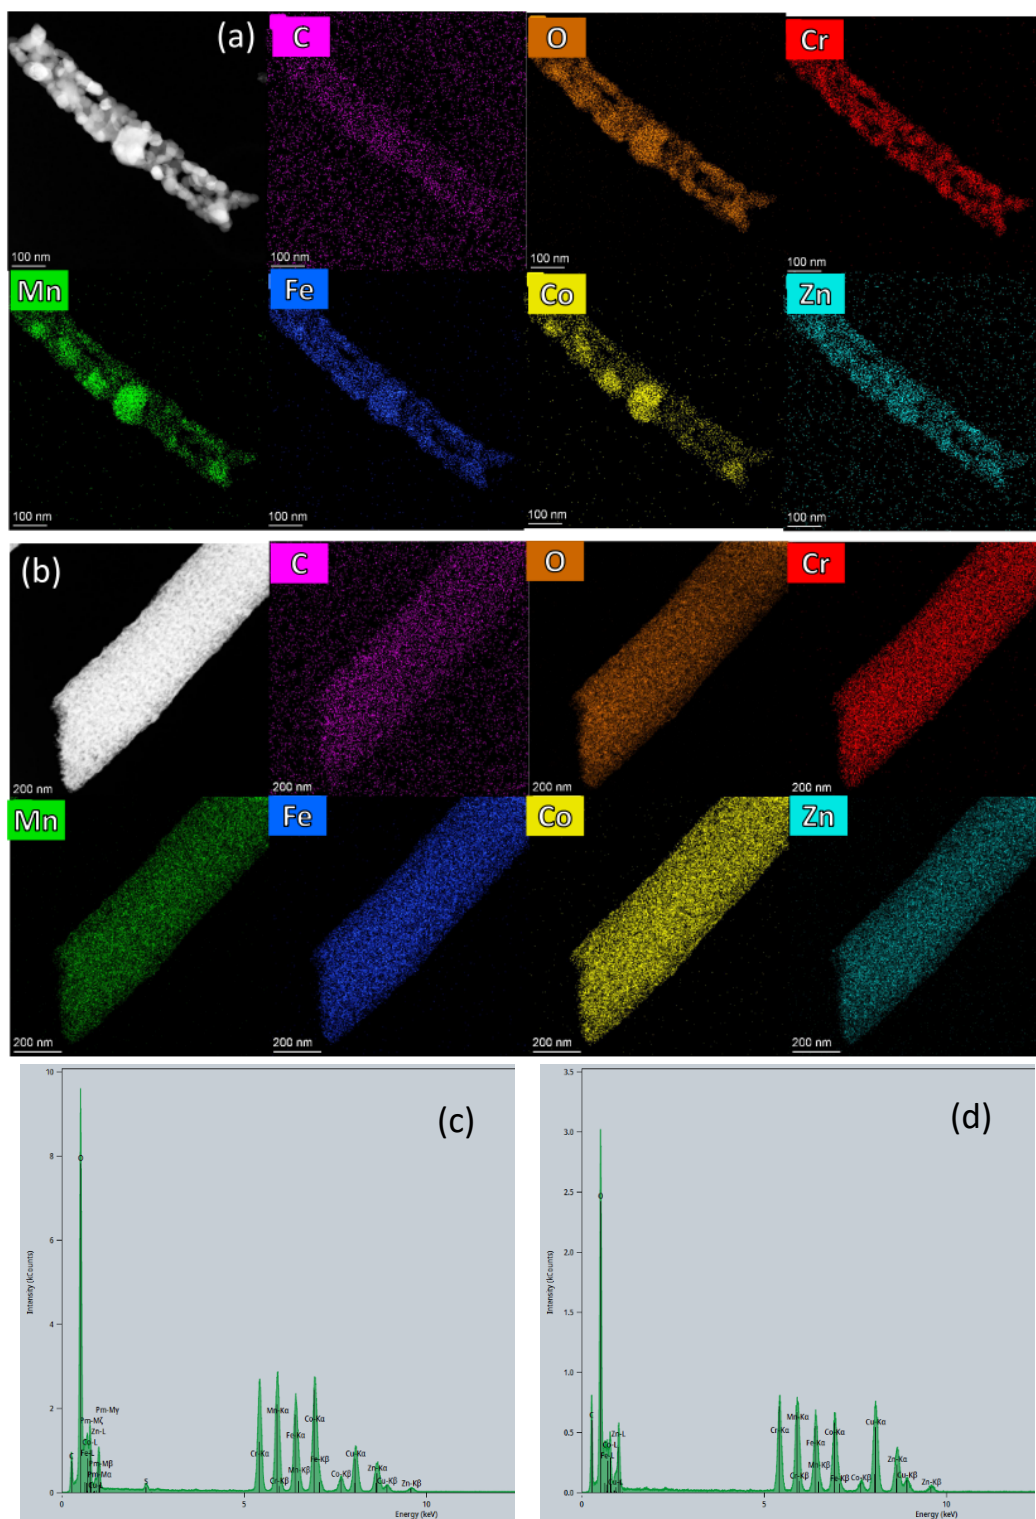

**Figure S14.** Results of the STEM/EDX analysis on sample C5MG-b. The shown results refer to (a,c) C-poorer and (b,d) C-richer NFs.

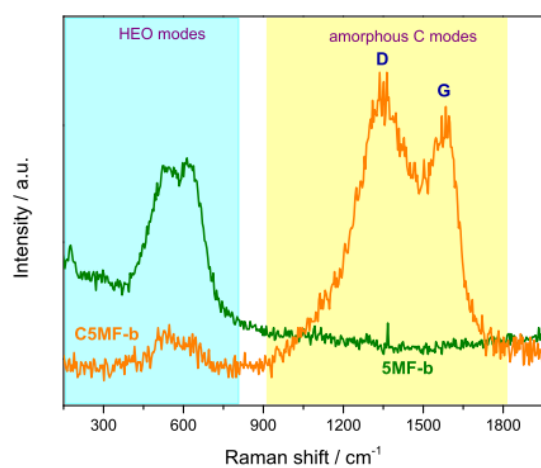

**Figure S15.** Micro-Raman spectra of samples 5MF-b and C5MF-b.
